# Supplementary material for: Yeast cell death pathway requiring AP-3 vesicle trafficking leads to vacuole/lysosome membrane permeabilization
Source: PubMed Central journal article supplement — Cell Rep. Author manuscript; Available in PMC 2022 May 6. (PMC9074372; doi:10.1016/j.celrep.2022.110647), 2022-04-12
Supplement: NIHMS1798348-supplement-1.pdf [file NIHMS1798348-supplement-1.pdf]

**Supplemental information**

**Yeast cell death pathway requiring AP-3 vesicle  
trafficking leads to vacuole/lysosome  
membrane permeabilization**

**Zachary D. Stolp, Madhura Kulkarni, Yining Liu, Chengzhang Zhu, Alizay Jalisi, Si Lin, Arturo Casadevall, Kyle W. Cunningham, Fernando J. Pineda, Xinchun Teng, and J. Marie Hardwick**

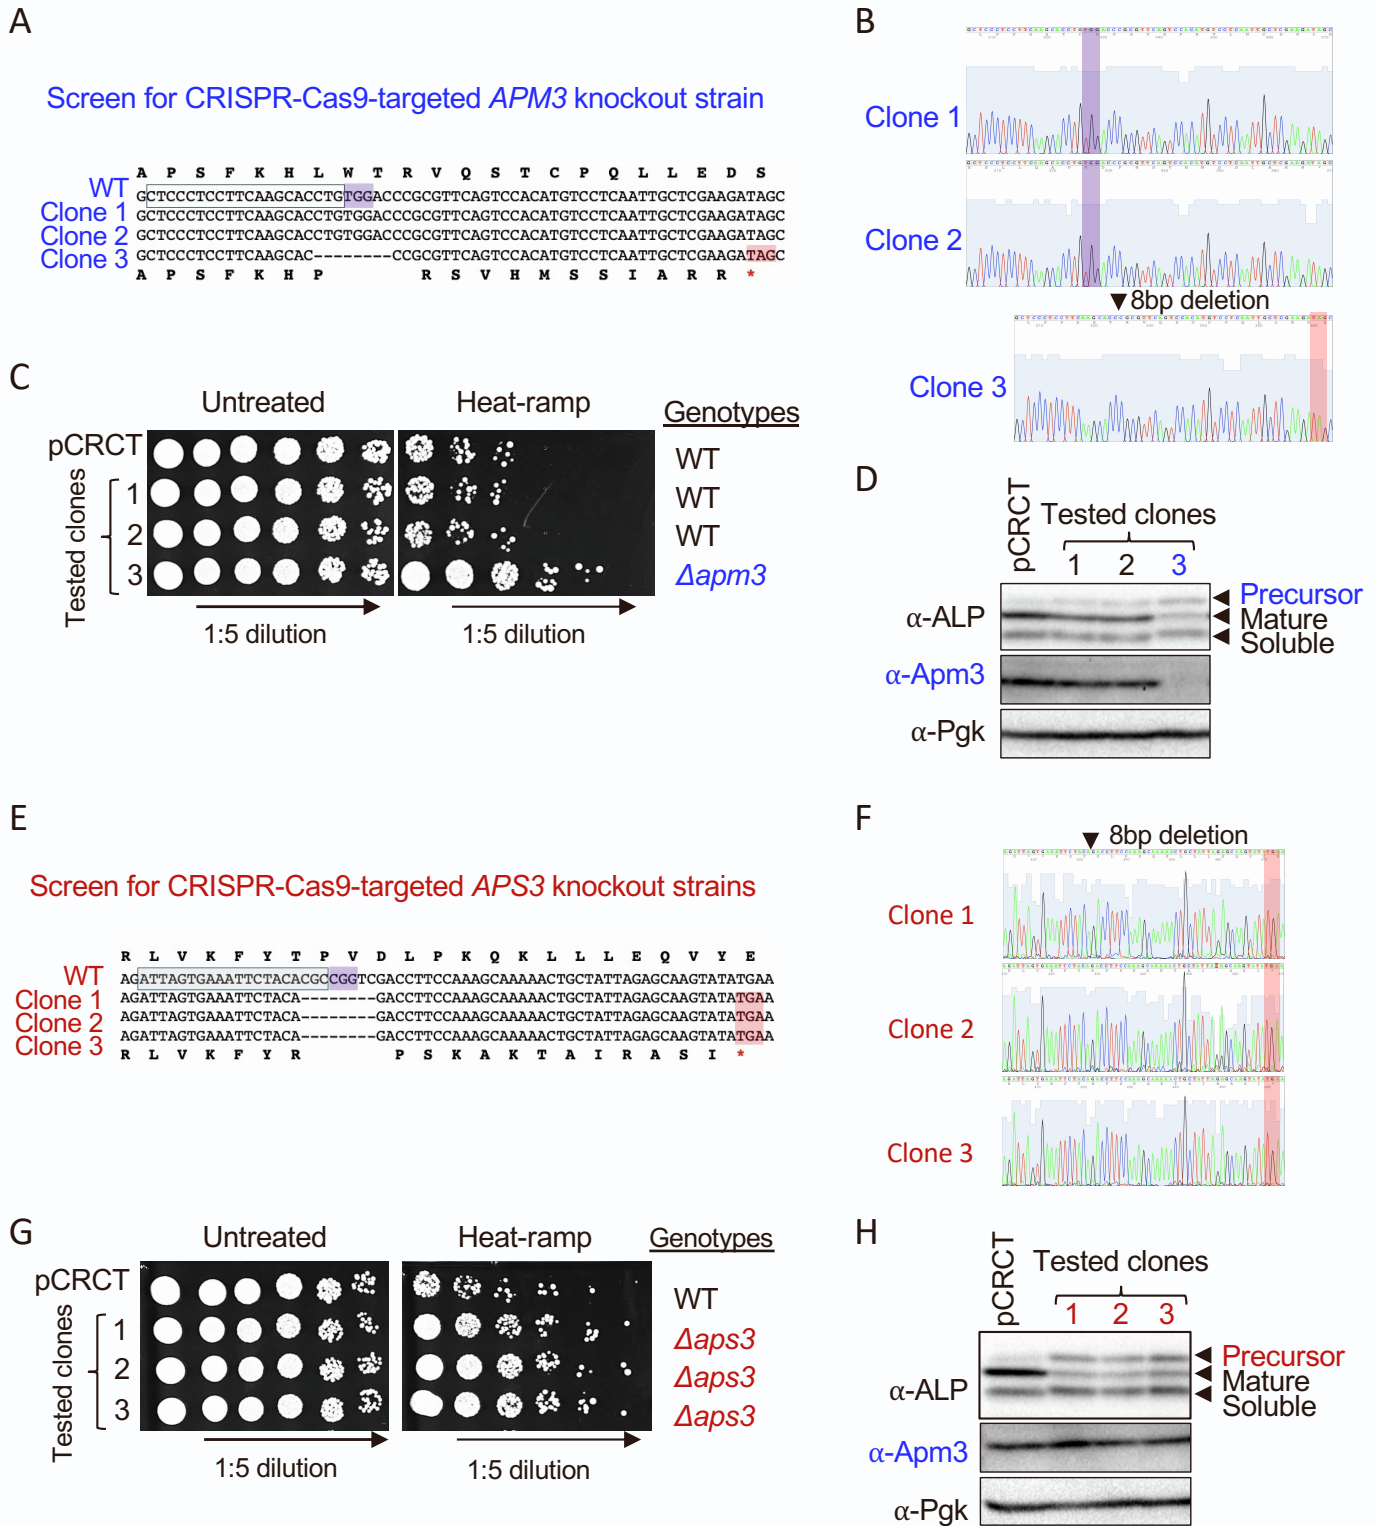

**Figure S1. CRISPR-Cas9 design and sequencing for *APM3* and *APS3* knockout strains. [supports Figure 2]**

(A and E) Sequence alignments of genomic DNA from three colony-derived yeast clones (BY4709) transformed with gene-targeted or untargeted CRISPR pCRCT plasmids. CRISPR-Cas9 guide RNA sequence (box), PAM sequence (violet), and resulting in-frame stop codon (rose) following 8 bp deletion. (B and F) Sanger sequencing chromatograms for A and E. (C and G) Heat-ramp cell death assays for sequenced clones (30°C to 51°C as described in Figure 1A) confirm that death-resistance correlates with gene disruptions. (D and H) Tests for AP-3 trafficking function by assessing transport and processing of the precursor form of alkaline phosphatase (ALP/Pho8) to mature and soluble forms detected with anti-ALP antibody (from Gregory Payne, UCLA). Apm3 immunoblots confirm lack of expression in *Δapm3*, and evidence for AP-3 complex stability in *Δaps3*, assessed with anti-Apm3 antibodies provided by Dr. Sandra Lemmon, University of Miami (Panek et al., 1997).

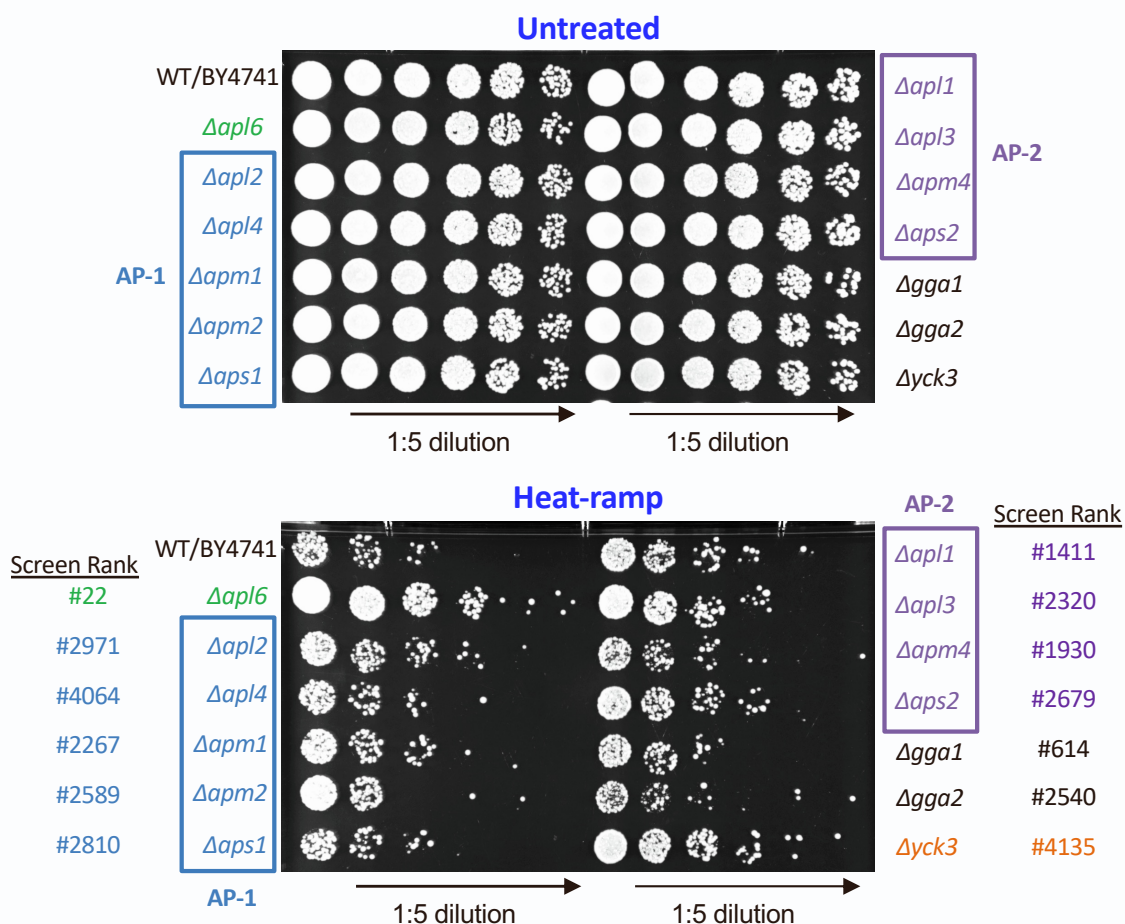

**Figure S2. Cell death assay confirming lack of death-resistance for deletion strains of adaptor complexes AP-1 and AP-2.** [supports Figure 2] Log phase yeast cultures of AP-1 (blue boxes), AP-2 (violet boxes) and other yeast knockout strains (BY4741 *MATa* YKO collection) were spotted on plates before (upper) and after (lower) heat-ramp treatment (20-min, 30°-51°C, from Figure 1A) and compared to the death-resistant AP-3 subunit Apl6 knockout (*Δapl6*). Ranks from the genome-wide heat-ramp screen in Figure 2A and Supplementary Table S1 are shown.

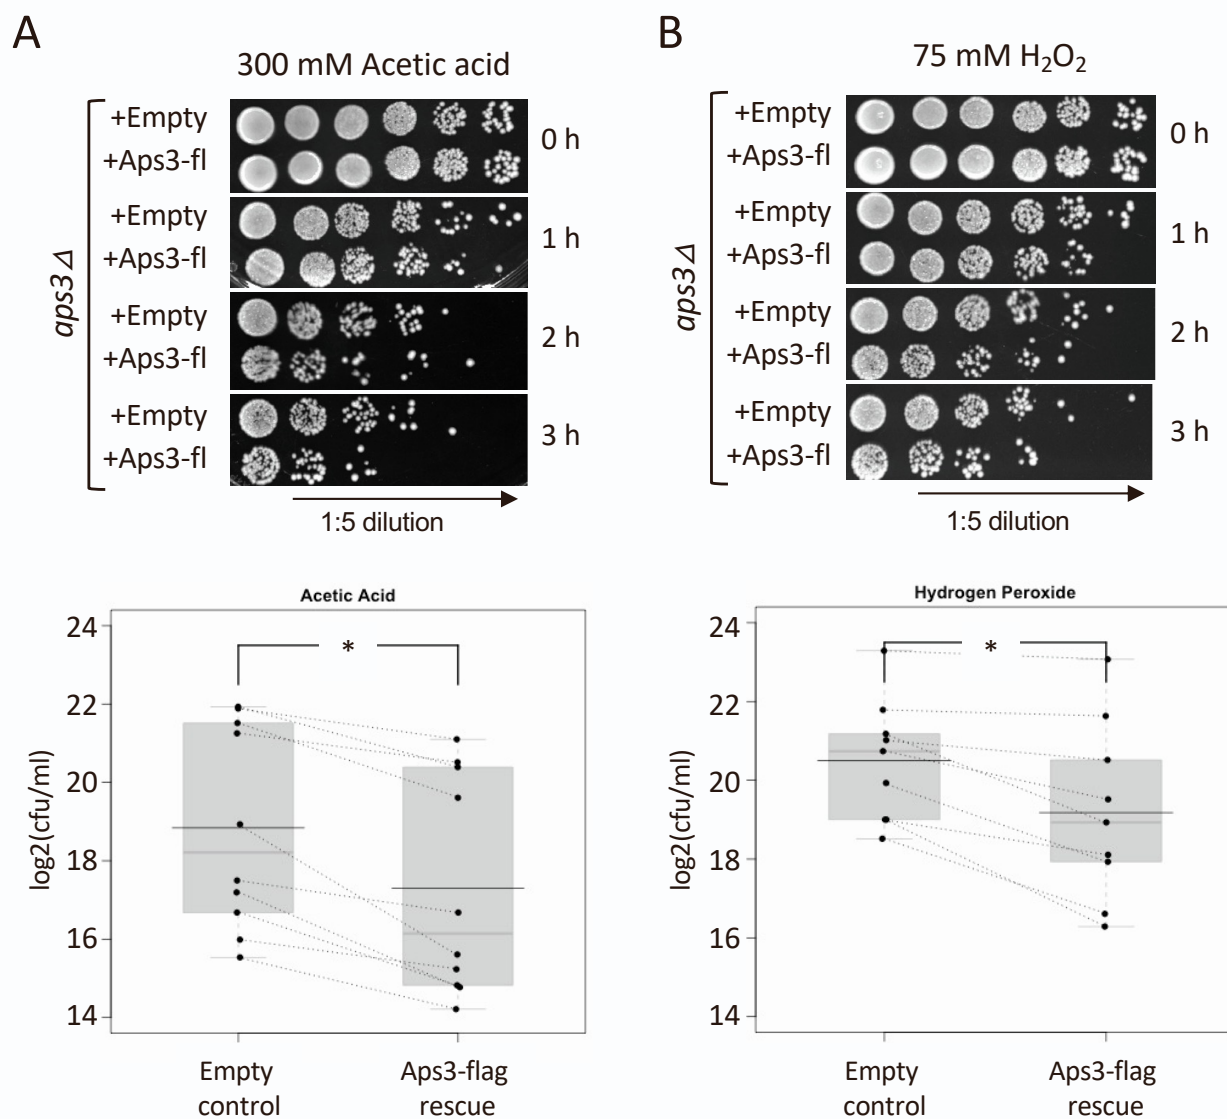

**Figure S3. Rescue of  $\Delta$ *aps3* with *APS3-Flag* restores susceptibility to acetic acid and H<sub>2</sub>O<sub>2</sub>-induced cell death** [supports Figure 3]

(A) Survival of  $\Delta$ *aps3* + untargeted control or APS3-Flag grown to log phase and spotted before and after treatment of  $\Delta$ *aps3* + untargeted control (empty prS303) or APS3-Flag rescue grown to log phase and spotted before and after treatment with 242-300 mM acetic acid for 1-3 h. Quantified results are from 10 determinations (5 at 2 h and 5 at 3 h) in 5 independent experiments, presented as log<sub>2</sub>(cfu/ml). Paired, 2-tailed t-test yields \**p* = 0.00036.

(B) Same as described in A, except treated with 50-75 mM H<sub>2</sub>O<sub>2</sub> for 1-3 h. Quantified as for A except for 9 determinations (5 at 2 h and 4 at 3 h) in 5 independent experiments. Paired, 2-tailed t-test yields \**p* = 0.0029. All data are presented.

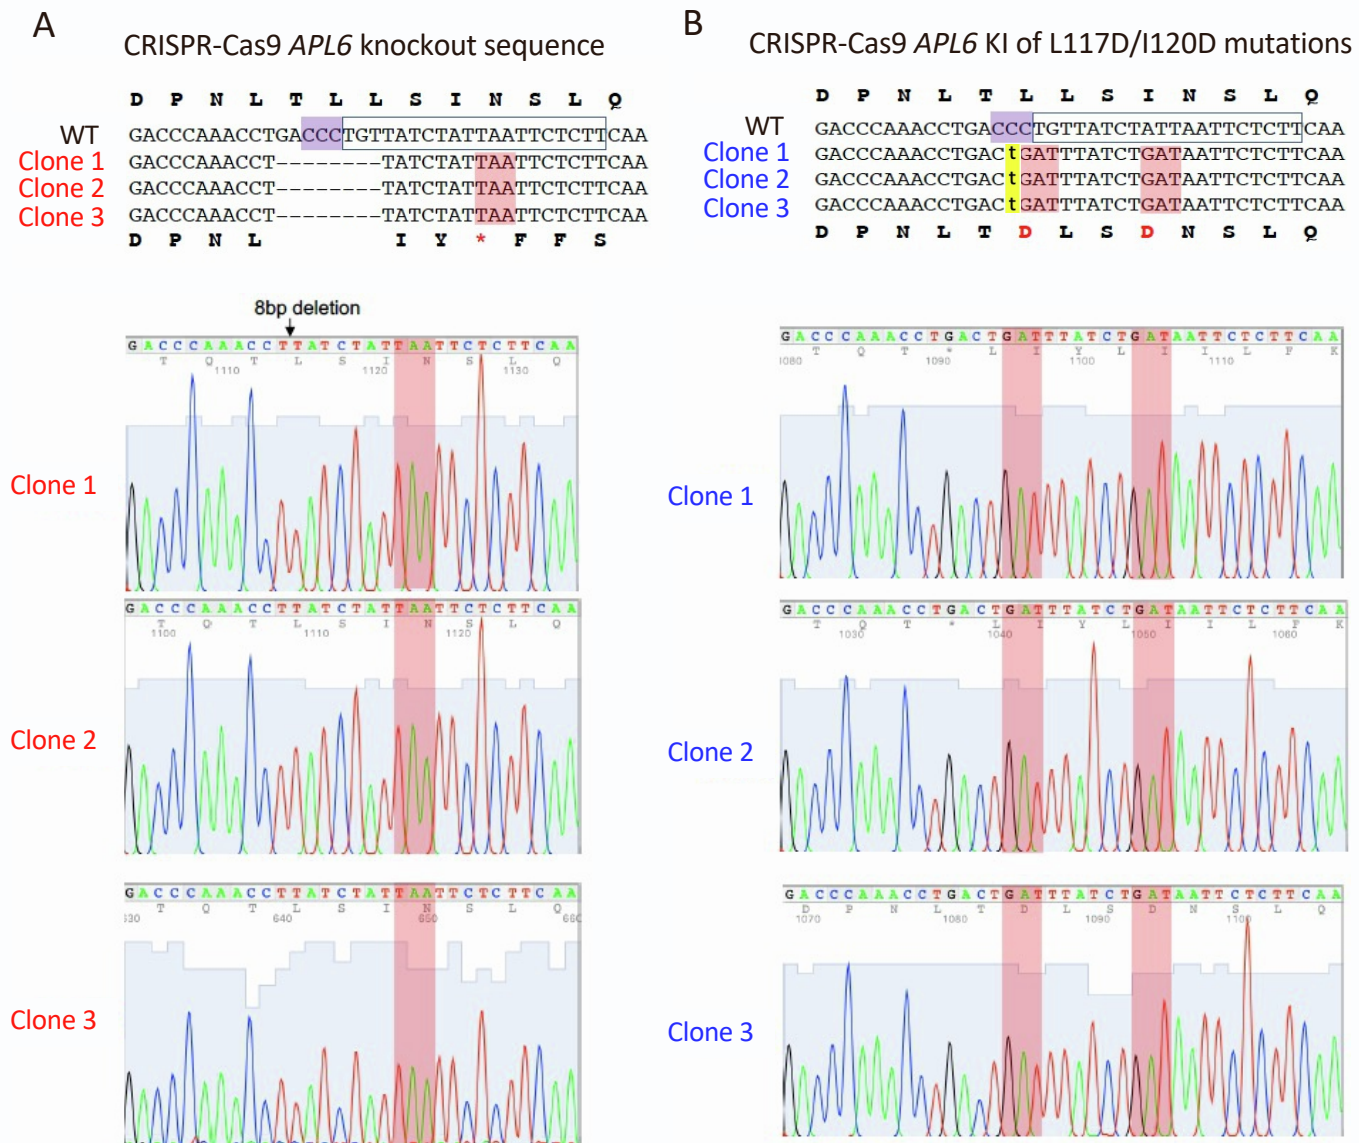

**Figure S4. CRISPR-Cas9 design and sequencing for *APL6* knockin and knockout mutant strains. [supports Figure 4]**  
 (A) Genomic DNA sequence alignment of *APL6*-disrupted strains in BY4709 background, showing CRISPR-Cas9 guide RNA sequence (box), PAM sequence (violet), the resulting in-frame stop codon (rose) following 8 bp deletion, and corresponding Sanger sequencing chromatograms.  
 (B) Genomic DNA sequence alignment of Arf1-interacting site mutations engineered into *APL6* knockin strains (BY4709). CRISPR-Cas9 guide RNA sequence (box); PAM sequence (violet); knockin Leu117Asp/Ile120Asp mutations (rose) based on Ren *et al.* Cell 2013; synonymous C>T nucleotide change engineered to eliminate PAM sequence (lower case, yellow highlight); corresponding Sanger sequencing chromatograms.

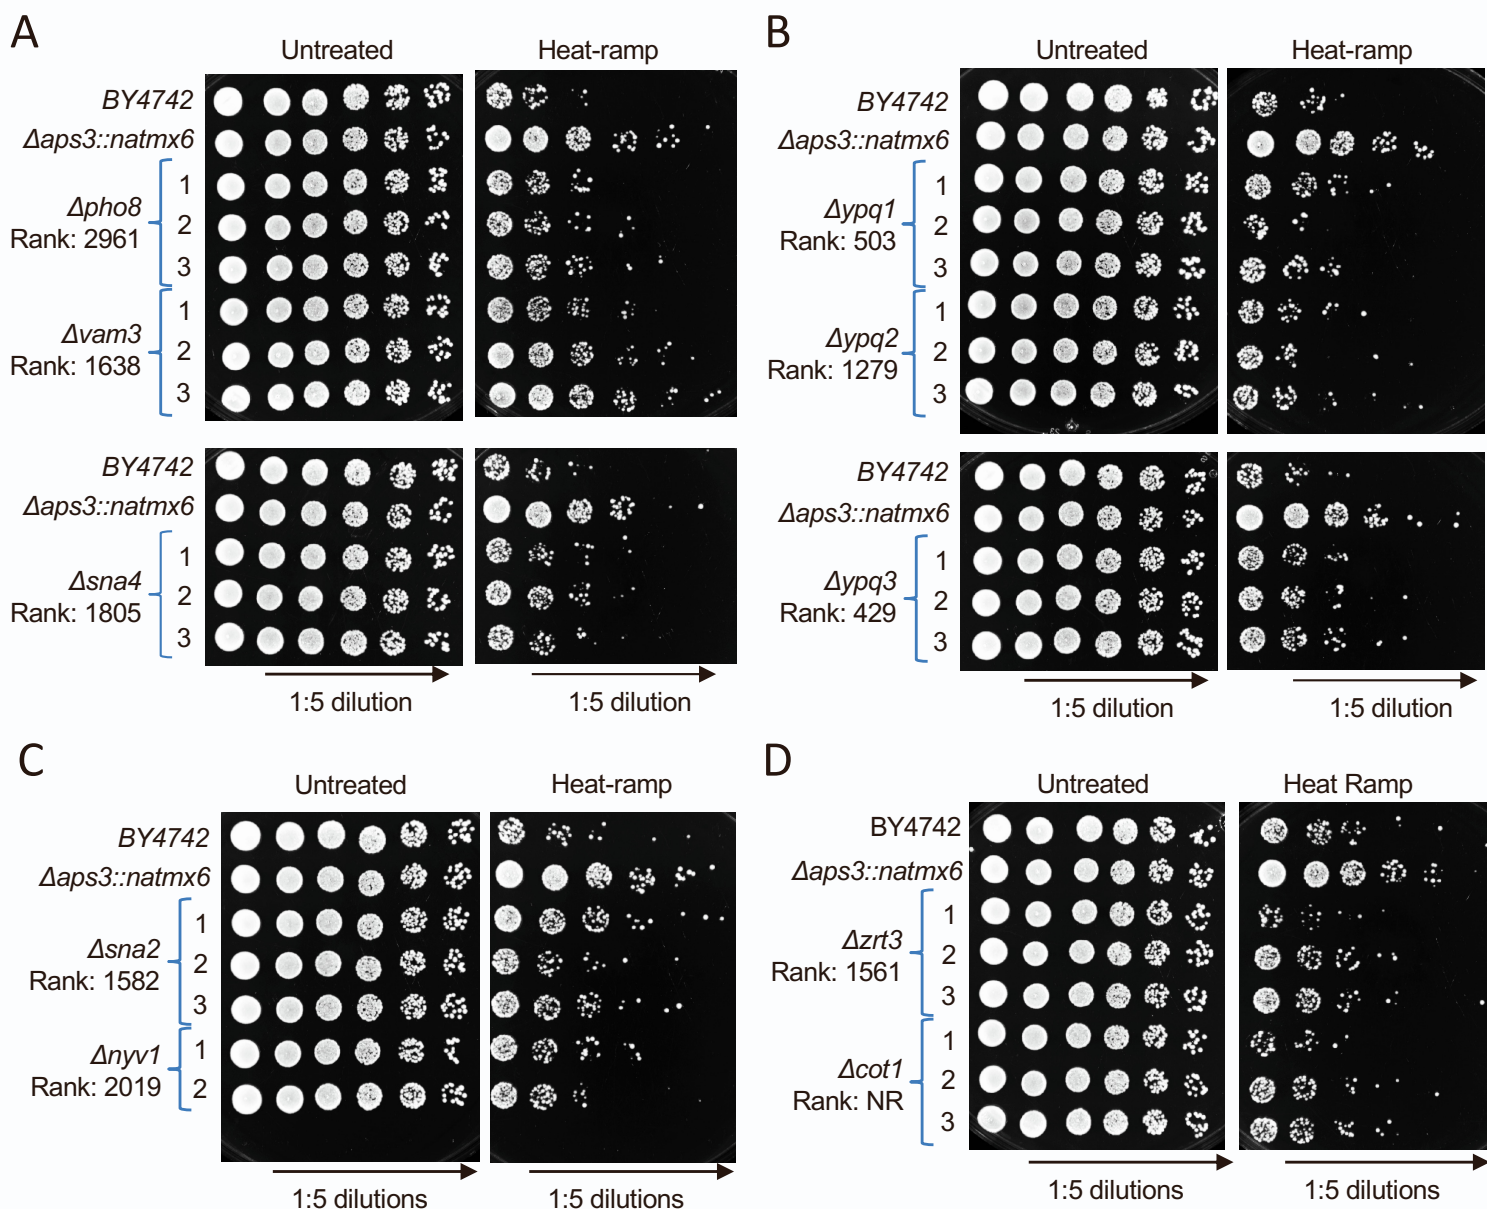

**Figure S5. Retesting knockout strains of AP-3 cargo for cell death phenotypes. [supports Figure 4]** Cell death assays for knockouts of AP-3 cargo proteins that contain a di-leucine motif (A and B), or a tyrosine motif (C), for interacting with AP-3, and other candidate cargo (D). Growth/survival of spotted yeast cultures before and after heat-ramp (20 min, 30°C to 51°C, Figure 1A). Each strain from the BY4741 YKO collection was streaked onto rich (YPD) agar plates and three single cell-derived colonies (substrains #1-3) were tested in parallel with the AP-3 knockout  $\Delta aps3$  and its parental wild type (BY4742). Five-fold serial dilutions were plated (5  $\mu$ L) and imaged after incubating 2-days at 30°C. Rank: z-scores for cell death resistance from the genome-wide screen.

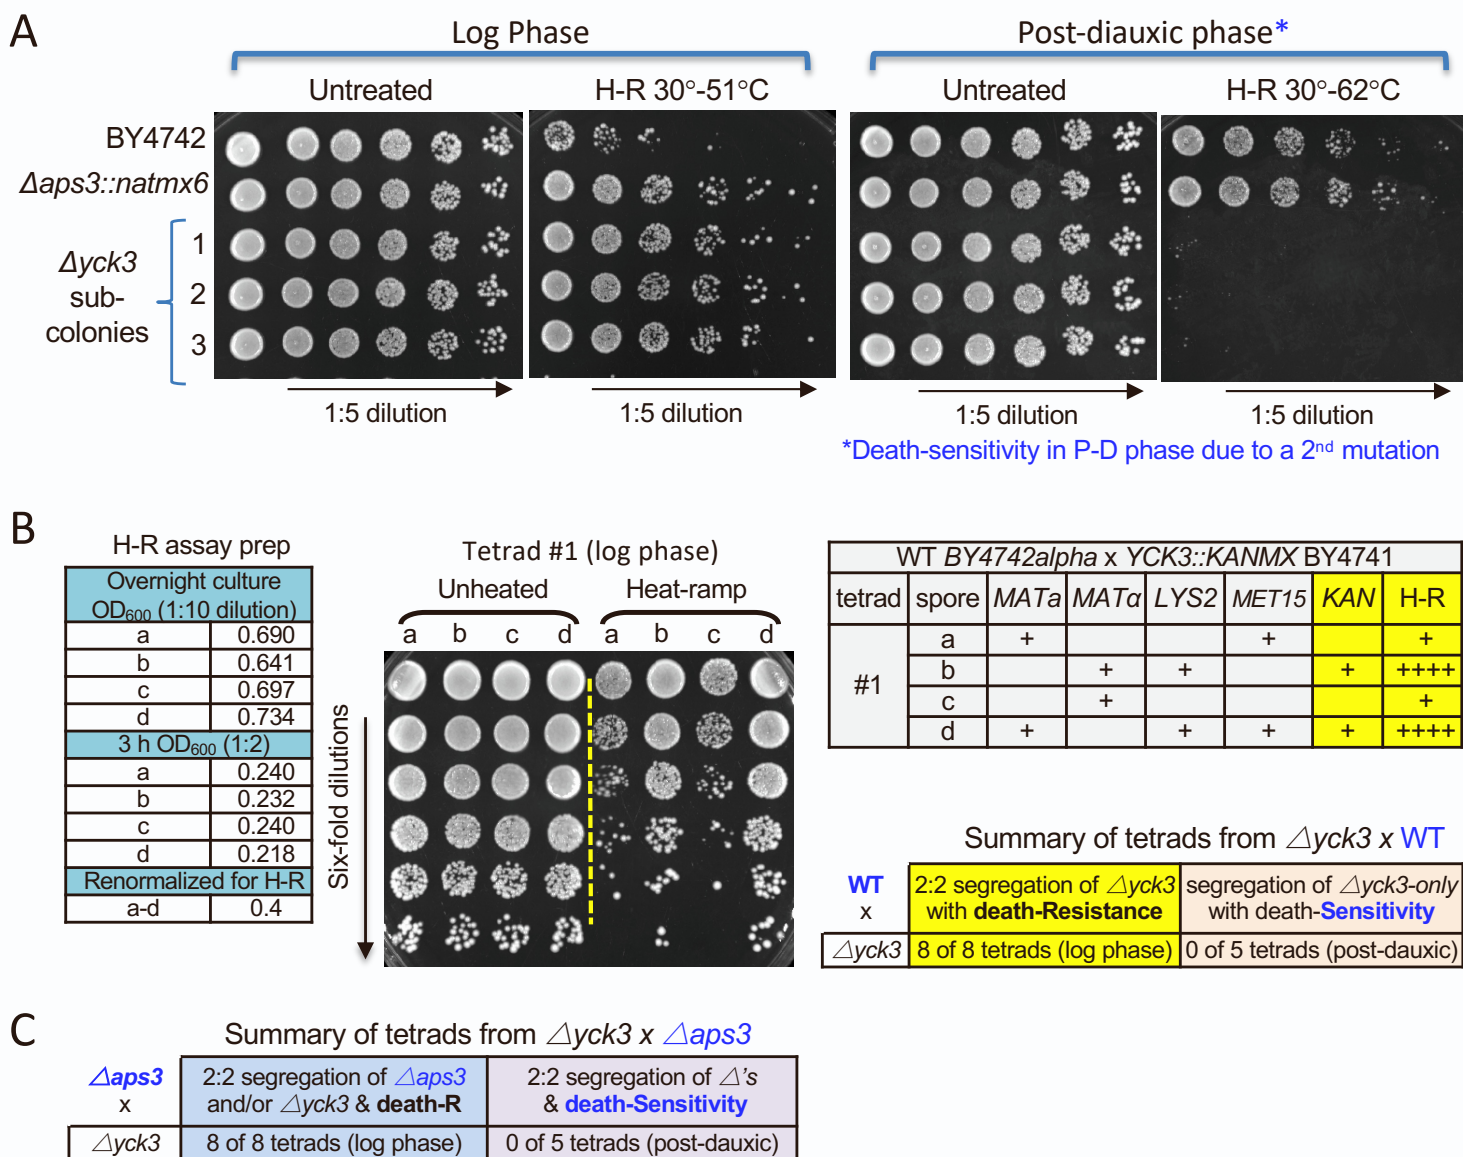

**Figure S6. Deletion of YCK3 confers death-resistance [supports Figure 4 main text]**

(A) Heat-ramp cell death assay for single cell-derived substrains of  $\Delta yck3$  (BY4741 YKO collection) and reference strains tested in log-phase (20-min, 30°C to 51°C, as in Figure 1A) and in post-diauxic phase used in the genome-wide screen (20-min, linear 30°C to 62°C). Note this BY4742 strain is more death resistant than most BY4741

(B) Cell death assay results for example tetrad (4 spore-derived strains, a-d) from crossing WT x  $\Delta yck3$  and tested as in A. ODs of yeast cultures during sample preparation prior to heat-ramp (left) to minimize effects of metabolic state differences on cell death versus survival following heat-ramp (middle). Tetrad validation markers (upper right), reveal co-segregation of the knockout locus (*KanMX*) with death-resistance, summarized for all tetrads tested (lower right). Death-resistance (R), death-sensitive (S).

(C) Summary of cell death results for all tetrads tested from crossing  $\Delta yck3$  x  $\Delta aps3$  in log and post-diauxic phases as in A. Cell death sensitivity in post-diauxic phase-only is due to a secondary mutation that segregates independently, and is assumed to be present in the original  $\Delta yck3$  strain as it is present in crosses to both  $\Delta aps3$ , and to WT (B), while crosses  $\Delta aps3$  or other AP-3 knockouts to WT lack this mutation.

**Post-diauxic heat-ramp method details.** Strains were streaked onto rich YPD agar, incubated 2-days at 30°C, and approximately matched numbers of cells from individual colonies (substrains) or the population, were grown in liquid YPD on a roller at 30°C for ~16 h. Starting OD<sub>600</sub> was recorded, cultures were normalized to 0.2 OD<sub>600</sub>/mL in 3 mL fresh YPD, and grown for 3 h with rotation at 30°C to reach log phase with closely matched OD<sub>600</sub> between samples (~0.45 OD<sub>600</sub>). Cultures were re-normalized to 0.4 OD<sub>600</sub>, 100  $\mu$ L was transferred to 0.2 mL tubes for heat-ramp treatment in a thermocycler, and 3  $\mu$ L of serial dilutions were immediately spotted on YPD agar and incubated 18-24 h for BioSpot imaging, or 2-days for visual imaging on a ChemiDoc® Imager (Bio-Rad, CA, USA), exposure time 0.175 seconds.

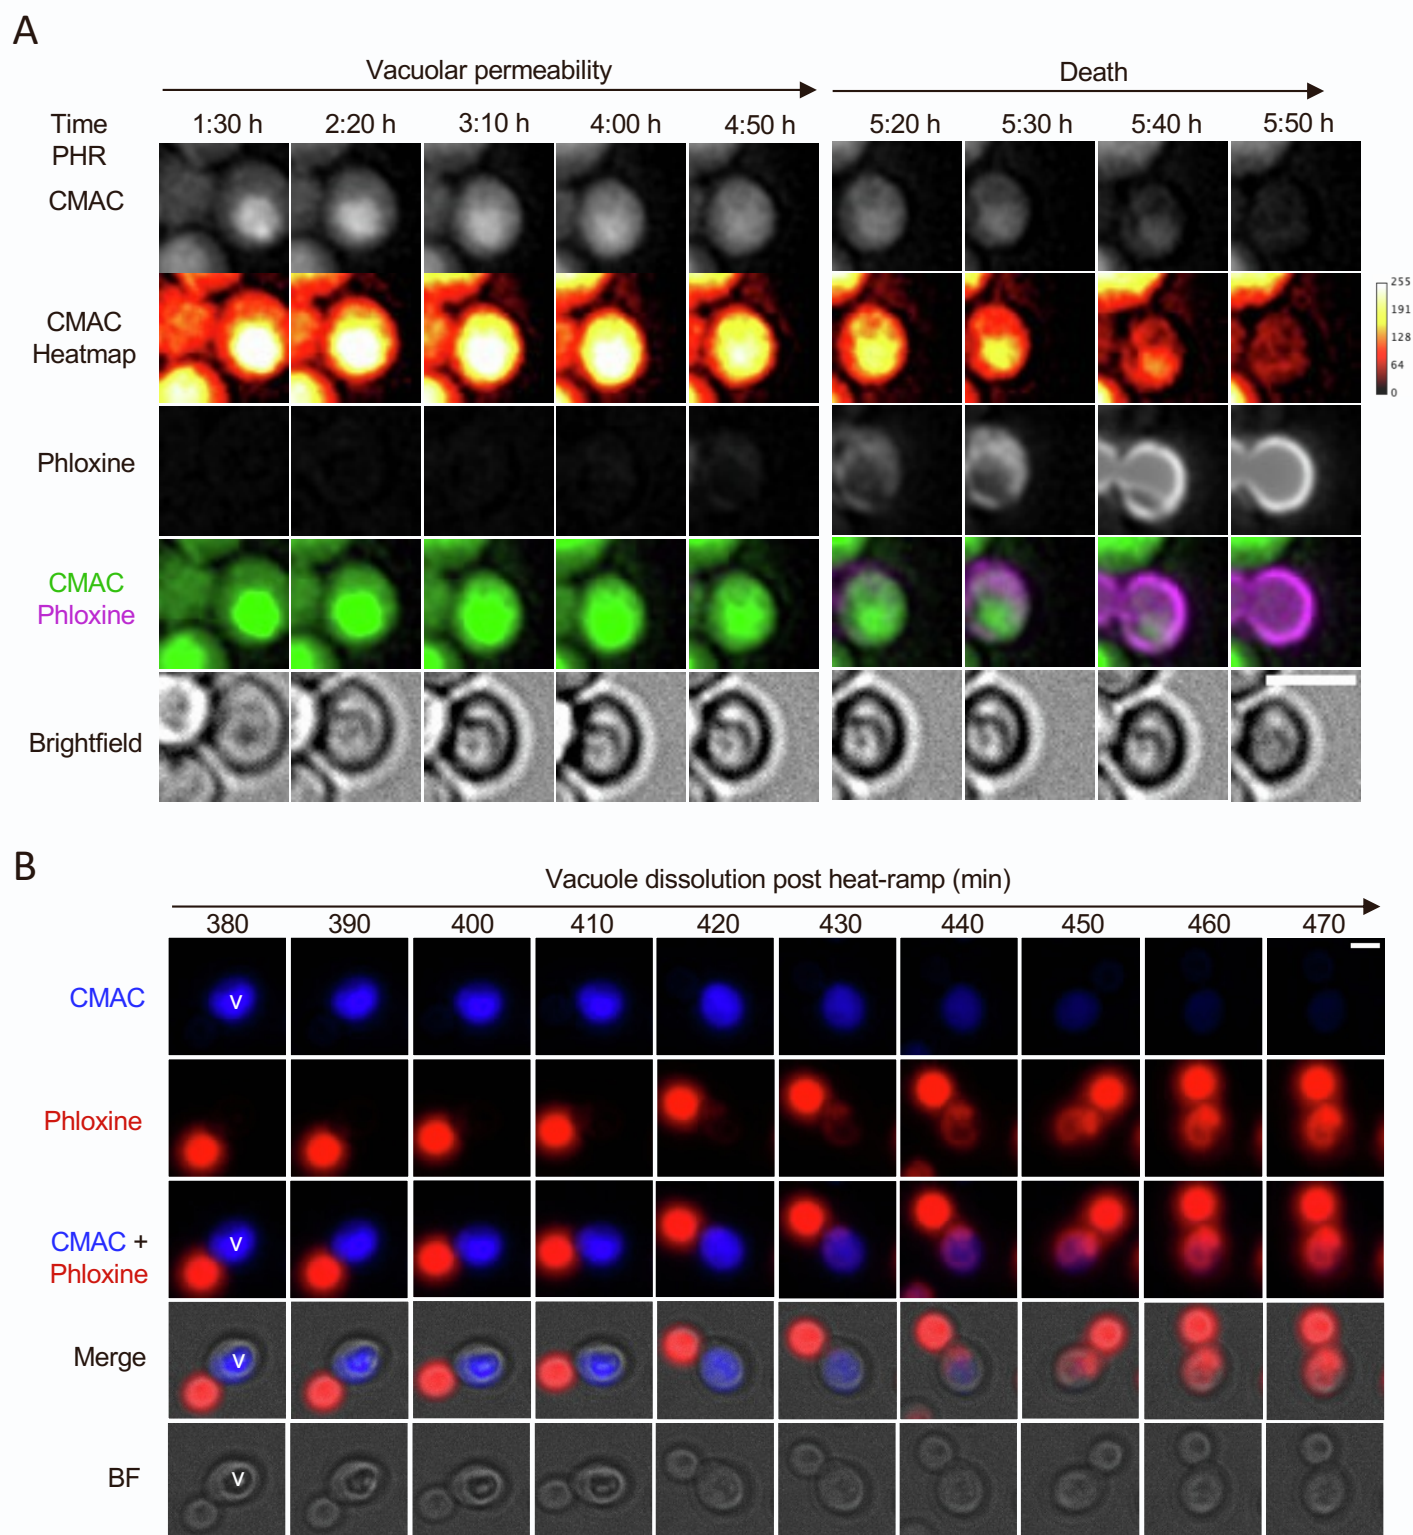

**Figure S7. Vacuole membrane permeabilization after heat-ramp treatment.** [supports Figure 6A]

(A) A second example as described in Figure 6A, time stamped post heat-ramp (PHR). Scale bar 2.5  $\mu$ m.

(B) Non-deconvolved micrographs from an independent experiment showing vacuole (v) permeabilization and subsequent phloxine staining of WT cells after heat-ramp. Scale bar 2.5  $\mu$ m.

Table S2. Primers and CRISPR gene block sequences (related to STAR Methods)

| Primer                | Use/Description                                                                                                                                                   | Sequence                                                           |
|-----------------------|-------------------------------------------------------------------------------------------------------------------------------------------------------------------|--------------------------------------------------------------------|
| $\Delta$ aps3 NAT FW  | Upstream primer for generation of $\Delta$ aps3::NatMx6                                                                                                           | AGATCTGGGTACAGAGGCCAGAACACATATAACGTTACACAATGGAC ATGGAGGCCAGAAATACC |
| $\Delta$ aps3 NAT REV | Upstream primer for generation of $\Delta$ aps3::NatMx6                                                                                                           | CTTGACGAACGAAAAATAACCATCATCCGATTAATTTGTTTGTACAGTA TAGCGACCAGCATTCA |
| APS3 Primer A v2      | FWD primer for APS3 Genotyping                                                                                                                                    | TAGTTCTCATTCACTCTTTTCTTTCTTTTGAATACGATGG                           |
| APS3 Primer D v2      | Reverse primer for APS3 Genotyping                                                                                                                                | CCTGTCAAAAAGAAAGAAAACCTATTCTAGACACAGCGAGAT                         |
| 5' NatMX6 REV         | 5' insertion genotyping primer for $\Delta$ aps3::NatMx6                                                                                                          | GAAAGAAGAACCTCAGTGGCAATCCTAACCTTTTATATT                            |
| 3' NatMX6 FWD         | 3' insertion genotyping primer for $\Delta$ aps3::NatMx6                                                                                                          | TCAGTACTGACAAATAAAAGATTCTTGTTTTCAAGAACTT                           |
| APS3 Primer B         | 5' WT internal REV genotyping primer for APS3                                                                                                                     | TTGCTCTAATAGCAGTTTTTGCTTT                                          |
| APS3 Primer C         | 3' WT internal FWD genotyping primer for APS3                                                                                                                     | TGAATTGATTTCTCAAAGGAATAGC                                          |
| APM3 Primer A v2      | FWD primer for APM3 Genotyping                                                                                                                                    | ATGTTGCTAAATATATTTCCAATACTATTGGAACGCTGTTGGTA                       |
| APM3 Primer D v2      | REV primer for APM3 Genotyping                                                                                                                                    | TTTTGACTGTTTCCCTCCTGCCATTCAATTAACCTCAATCACTC                       |
| APL6 Primer A         | FWD primer for APL6 Genotyping                                                                                                                                    | AAGTTACCAAAGATTGGAAGAGGT                                           |
| APL6 Primer D         | REV primer for APL6 Genotyping                                                                                                                                    | TGTATTAGGCTTGACTTTCTTCACC                                          |
| VPH1-Envy FWD         | FWD primer for generation of VPH1 C' terminally tagged with Envy                                                                                                  | ATGGAAGTCGCTGTTGCTAGTGCAAGCTCTCCGCTTCAAGC GGTGACGGTGCTGGTTA        |
| VPH1-Envy REV         | REV primer for generation of VPH1 C' terminally tagged with Envy                                                                                                  | GTAATAATGTTTCGCTTTTTTAAAGTCCTCAAAATTTATCGAT GAATTCGAGCTCG          |
| PEP4-Envy FWD         | FWD primer for generation of PEP4 C' terminally tagged with Envy                                                                                                  | TACGATTTGGGCAACAATGCGGTTGGTTGGCCAAAGCAATTGGTG ACGGTGCTGGTTTA       |
| PEP4-Envy REV         | REV primer for generation of PEP4 C' terminally tagged with Envy                                                                                                  | GCAGAAAAGGATAGGGCGGAGAAGTAAGAAAAGTTAGCTCATC GATGAATTCGAGCTCG       |
| APS3 Endo Prom FWD    | FWD primer for cloning APS3 under native promoter into pRS303                                                                                                     | TAGAACTAGTGGATCTTCTTTTTTATATTCTTCTCTT                              |
| APS3 FLAG REV         | REV primer for cloning APS3-FLAG into pRS303                                                                                                                      | TAGAACTAGTGGATCTTCTTTTTTATATTCTTCTCTT                              |
| gBlocks               | Sequence                                                                                                                                                          |                                                                    |
| APS3 deletion         | CTTTGGTCTCACCAAAACTTGGTATAGTCAATAAGAAATGCCAACCAAGATTAGTGAAATTCTACAGACCTTCCAAAGCAAAAACCTGCTATTA<br>GAGCAAGTATATGAATTGATTTCATTAGTGAAATTCTACACGCGTTTTAGAGAGAGACCTTTC |                                                                    |
| APM3 deletion         | CTTTGGTCTCACCAAAACCTTATTTCCAGTATCTTTTAGGTGCAACAGCTCCCTCCTTCAAGCACCCGCGTTCAGTCCACATGTCCTCAATTGC<br>TCGAAGATAGCAGTAGTGATGATCTCCCTCCTTCAAGCACCTGGTTTTAGAGAGAGACCTTTC |                                                                    |
| APL6 deletion         | CTTTGGTCTCACCAAAACAGACTTATTCACCTGTATTTACTTAGATTTGCAGAAAATGACCCAAACCTTATCTATTAATTtCTTCAAAAATCATT<br>GTCTGATTGCAATTCGAAGTGAAGAGAATTAATAGATAACAGTTTTAGAGAGAGACCTTTC  |                                                                    |
| APL6 L117D/I120D      | CTTTGGTCTCACCAAAACAGACTTATTCACCTGTATTTACTTAGATTTGCAGAAAATGACCCAAACCTGACtgatTTATCTgatAATCTCTTCAAA<br>AATCATTGTCTGATTGCAATTAAGAGAATTAATAGATAACAGTTTTAGAGAGAGACCTTTC |                                                                    |
